# Supplementary material
Source: PubMed Central journal article supplement (PMC3657816)
Supplement: 1219995110_pnas.201219995SI.pdf [file 1219995110_pnas.201219995SI.pdf]

# Supporting Information

Lin et al. 10.1073/pnas.1219995110

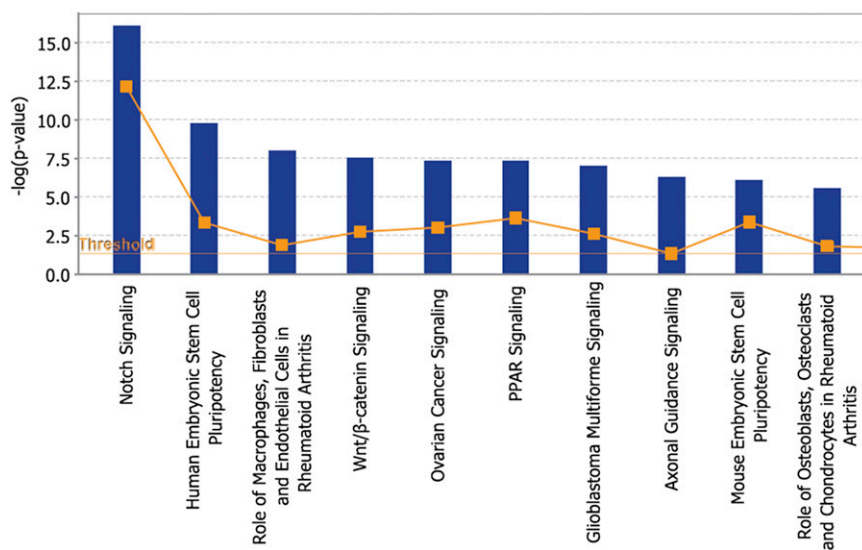

Fig. S1. Top 10 signaling pathways with  $P$  values based on analysis of the array data using the Ingenuity system ([www.ingenuity.com](http://www.ingenuity.com)).
